# Supplementary material
Source: Springer Nature journal article supplement (https://www.springermedizin.de/resource/supplementary/12889_2014_7186_MOESM2_ESM.pdf/9496996)

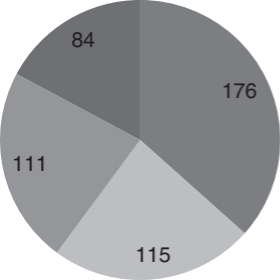

■ No long term Problem

■ Prolonged Labor

■ Pain during Sex

■ Excessive Bleeding during Birth

Supplement: MOESM2 [file 9496996]
